# Supplementary material for: Heterologous Reconstitution of the Intact Geodin Gene Cluster in Aspergillus nidulans through a Simple and Versatile PCR Based Approach
Source: PLoS One. 2013 Aug 23;8(8):e72871. doi: 10.1371/journal.pone.0072871 (PMC3751827; doi:10.1371/journal.pone.0072871)
Supplement: Table S2 — Primers list. The sequence of PCR products # 1-3 corresponds to supercontig 12: 1302695-1315163 (ATEG_08454-08460) in the genome sequenced isolate NIH2624 (IBT28053). Similarly, PCR products # 4-6 and 8 corresponds to supercontig 12: 1289727-1304484 (ATEG_08449-08454) in NIH2624 (IBT28053). * = For reference see Hansen et al ([7]). (XLSX) [file pone.0072871.s008.xlsx]

## Sheet: Sheet1
PCR product #		Primer pair (fw/rv)	Forward primer	Reverse Primer	Description
1		455/456	agctcacuCCAGATCAACCAGCAGACGA	aggcccagguGACGTTTGCGATTCCGCCCA	4.072 bp of A.terreus IBT15722 gDNA spanning putative ORFs ATEG_8454-8456 including 1788 bp overlap with 521/464 PCR product
2		457/177	acctgggccuCGTGAGTTGGGATGGAATGA	aacacaauGAAGGCTGTGTGATGCCCGG	4.382 bp of A.terreus IBT15722 gDNA spanning putative ORFs ATEG_8457-8458
3		178/508	attgtgtuAGATACCGCCAGAACTGCCTA	actggagauCGAGGATATGGAAGGACACTA	3.993 bp of A.terreus IBT15722 gDNA spanning putative ORFs ATEG_8459-8460
4		459/460	agctcacuTTAGAACCCAGCAGCAAGGCG	agcggacacuCCTGTCGCTGCAGTTCAGTT	4.430 bp of A.terreus IBT15722 gDNA spanning putative ORFs ATEG_8449-8451 (5')
5		461/462	agtgtccgcuAACGCTTAGAGGCAGCTACT	atctgcagacuGGATGACTAGATGGCACTGG	5.382 bp of A.terreus IBT15722 gDNA spanning the 3´ end of the Geodin PKS (ATEG_8451)
6		463/522	agtctgcagauAATGAGGTTACAATGCATCC	agcttacuTGTGATGCTCCCTGGTGACT	2.397 bp of A.terreus IBT15722 gDNA spanning putative ORF ATEG_8452
7		405/406	agtaagcuCCCTAATTGGCCCATCCG	atctgaaaauGCGGTAGTGATGTCTGCTCA	500 bp of A. nidulans PgpdA promoter amplified from pU1111 (20)
8		521/464	attttcagauGTCTGCAGAAGGACACAAGC	actggagauCATGGATTTGCGGCAGTACT	2.533 bp of A.terreus IBT15722 gDNA spanning putative ORFs ATEG_8453-8454 including 1788 bp overlap with 455/456 PCR product
9		84/71	atctccaguTTACACAGACCAGCAATCAT	agtgagcuCGCGGTTTTTTGGGGTAGTCATC	A. nidulans cloning vector pU1111 (Hansen et al, 2011)
10		77/422	atctccaguAGCGCGGCCGCATTTAAATC	acagagttcuTGAAGTGGTGGGCTAACTAC	1,6 kb of basic cloning vector PJ204 (DNA 2.0) including the ampR marker gene
11		421/70	agaactctguAGCACCGCCTACATACCTCG	agtgagcuTGGATAACCGTATTACCGCCTTTG	5,3 kb of A. nidulans cloning vector pU2000 (nomenclature from (20)) including A. fumigatus pyrG marker gene flanked by direct repeats and IS1 downstream targeting region
12		BGHA163/568	GGTCTACTCCCCTGCGTCTA	CTCATCCAGCCTGTTATCCA	Analytical PCR for verification of insertion of fragment1 in IS1 upstream targeting site
13		BGHA98/162	GGTTTCGTTGTCAATAAGGGAA	GTTCAGGGTGACGGTGAGAG	Analytical PCR for verification of insertion of fragment1 in IS1 downstream targeting site
14		112/108	gggtttaauATGTCTGCAGAAGGACACAAGC	gggtttaauATGACTACGACCTATGCAGT	Analytical PCR for verification of insertion of fragment2 in the overlap with the fragment1
15		BGHA 182/162	CACACATCGACATCCTCACC	GTTCAGGGTGACGGTGAGAG	Analytical PCR for verification of insertion of fragment2 in IS1 downstream targeting site
16		569/570	TCTGATCTGTCTGGAGCCT	gatccccgggaattgccatgCCGGACTAGACGGTTGGATT	Deletion of the geodin polyketide synthase, ATEG_8451. Amplifies 2,0 kb of A.terreus IBT15722 gDNA upstream of the putativeORF. Specific tail for use of A. fumigatus pyrG as selective marker
17		571/572	aattccagctgaccaccatgACTGGTATCAGATTGGTCCG	CTTCAGGTGCGAGTAATCTT	As above, but 2,0 kb downstream of the putative ORF
18		573/574	CACGGACGAGCATAGAATAG	gatccccgggaattgccatgACAGTCAGTCTTGGTCTGCG	Deletion of the putative sulochrin halogenase, ATEG_8460. Amplifies 2,0 kb of A.terreus IBT15722 gDNA upstream of the putativeORF. Specific tail for use of A. fumigatus pyrG as selective marker
19		J58/576	aattccagctgaccaccatgTTACACAGACCAGCAATCATC	AGAAGAGGTCTGTGATGCTGA	As above, but 2,0 kb downstream of the putative ORF
20		JBN 5A/2K	catggcaattcccggggatcTGGATAACCGTATTACCGCC	GGAAGAGAGGTTCACACC	Amplification of 1455 bp A. fumigatus PyrG 5' region for fusion PCR deletion substrates.
21		JBN 4Q/5B	TGATACAGGTCTCGGTCCC	catggtggtcagctggaatttGCCAAGCTTAACGCGTACC	Amplification of 1217 bp A. fumigatus PyrG 3' region for fusion PCR deletion substrates.
22		327/328	GAATCACTTGCCATCTTGCT	gatccccgggaattgccatgATTTCGGACATAGCTCGTTG	Deletion of A. nidulans mdp gene cluster (mdpA-L) - upstream fragment
23		329/330	aattccagctgaccaccatgTGCTGTATATGGGTCTTGG	CTGTTTTGAGGCGGTTCC	Deletion of A. nidulans mdp gene cluster (mdpA-L) - downstream fragment
24		BGHA 192/238	TCGTCAAGGTTTTCCCTTTGT	ACGCTATTGATGTGGTGAAT	Analytical PCR for verification of mdpA-L deletion
25		JBN J92/ J93	CCAGAGGCCAACCACCTAC	CACCAGCTCGATTAGCTTGCC	Analytical PCR for verification of ATEG_8451 deletion
26		JBN J94/J95	GGGAGCAGAAGCAAGAAGAG	CTCACTCGCCTCTCGTTGC	Analytical PCR for verification of ATEG_8460 deletion
27		JBN L52/L39	GTGCTCTCCAGGAGTCCG	GAGGCGACGAGCAAGCTG	Expression analysis of hhtA by qRT-PCR
28		JBN K23/K22	TCCTCAAACCCCTCCGCC	CTCCACCAGCCTCCACAG	Expression analysis of ATEG_8452 by qRT-PCR
29		JBN L34/L35	GGGACAACGAGGTGGATGAG	GGTACAGGACGAGGGTCG	Expression analysis of ATEG_8453 by qRT-PCR
30		JBN K20/K21	GGCGGGTTATCGCTCGATG	GGTATGGATGGAGGAACGGG	Expression analysis of ATEG_8455 by qRT-PCR
31		JBN K18/K19	GCCCCATGACCAGATCACC	CCAGTTCTTCGATCTCCTGCC	Expression analysis of ATEG_8456 by qRT-PCR
32		JBN L32/L33	GGGCATGAGCGAGGAGGA	GAGTGACGGCGGGACTATG	Expression analysis of ATEG_8457-1 by qRT-PCR
33		JBN K16/K17	CCCTACCAACAATGCACTGTTCC	CCCACCCACAAGCTCCTTC	Expression analysis of ATEG_8457-2 by qRT-PCR
34		JBN K13/K12	CTACATCTCCCAAGCCTGCTC	CTCCGCTCTTCAGAGCCC	Expression analysis of ATEG_8459 by qRT-PCR
35		JBN R39/R40	GTTACTCCAGCCCCTGCTC	CCCGAAACTTCTCTGCTATCACC	Expression analysis of mdpG by qRT-PCR
36		595/596	aattccagctgaccaccatgCTCCCTGGTGACTTGCCTAA	AACCCTGGTAAGCTTCTGCC	Deletion of the putative transcription factor ATEG_8453 - upstream fragment
37		593/594	TACGAGCCAAGGAGAACGAC	gatccccgggaattgccatgTGCTCTATTGTGGGTGTTCG	Deletion of the putative transcription factor ATEG_8453- downstream fragment
38		JBN K20/Q43	GGCGGGTTATCGCTCGATG	CACCGATCTTCAGGATGACGC	Analytical PCR for verification of ATEG_8453 deletion
39		DH110/DH111	atccccacuACCGCATTAAGACCTCAGCG	agctgctuCGTCGATTAAACCCTCAGCG	Amplification of vector backbone for propagation in E. coli including the ampR marker gene
40		DH112/DH113	aagcagcuCAAGAGGTACCCGCTACAGCA	atattgggcuAGCCTTCATTGACCAGCTTCG	Amplification of IS3 upstream targeting sequence
41		DH114/DH115	agcccaatauTAAGCTCCCTAATTGGCCC	agctcacuGGGCGCTTACACAGTACA	Amplification of A. nidulans promoter PgpdA (498 bp), uracil excision cassette and TtrpC sequence (PgpdA-S::UEC::TtrpC)
42		DH116/DH117	agtgagcuTGGATAACCGTATTACCGCC	attacctaguTGCCAAGCTTAACGCGTAC	Amplification of A. fumigatus pyrG from pDel2 (Nielsen et al 2008)
43		DH118/DH119	actaggtaauTGAATGTTGGAATAGGCTGTGC	agtggggauCTGCATACCCGTCGTAGTCCT	Amplification of IS3 downstream targeting sequence
44		DH120/DH121	agcccaatauGAAGTGGCTGATTTTGACGACTTG	atcgctcuTGTGATGCTCCCTGGTGAC	Amplification of 900 bp ATEG_8453 promoter (PgedR)
45		136/137	agagcgauATGACCATGATTACGGATTC	tctgcgauTTATTTTTGACACCAGACCA	Amplification of lacZ gene from (Hansen et al. 2011)
46		motni136/DH122	agagcgauATGACCATGATTACGGATTC	aatgtaUGCAGCCTTCCTCCACAACA	Amplification of lacZ::TtrpC::pyrG sequence from pU2113
47		DH123/DH119	atacatuGTGCCTGTCATTAAACGATGAG	agtggggauCTGCATACCCGTCGTAGTCCT	Amplification of IS3 downstream targeting sequence from pU2113
48		JBN W77/W78	agagcgauCTACCCTGTCTCTGCGTAGC	tctgcgauGAGGATATGGAAGGACACTATG	Amplification of the extended ATEG_8460 ORF + flanks
49		JBN K35/K36	agagcgauATGCTCGCATCGATGCGC	tctgcgauGGGCAGAGTAGCATAGCGG	Amplification of the original prediction of the ATEG_8460 ORF
